# Supplementary material for: Monoallelic variation in DHX9, the gene encoding the DExH-box helicase DHX9, underlies neurodevelopment disorders and Charcot-Marie-Tooth disease
Source: bioRxiv or medRxiv preprint supplement (doi:10.1101/2023.03.01.23286475), 2023-03-05
Supplement: Supplementary file [file media-1.pdf]

# Supplemental Figure 1

| Lab/Screen         | Methods                                                                                                       | Age (weeks) |   |   |    |    |    |    |    |    |    |
|--------------------|---------------------------------------------------------------------------------------------------------------|-------------|---|---|----|----|----|----|----|----|----|
|                    |                                                                                                               | 7           | 8 | 9 | 10 | 11 | 12 | 13 | 14 | 15 | 16 |
| Behaviour          | Openfield                                                                                                     |             | ■ |   |    |    |    |    |    |    |    |
|                    | Acoustic startle response & PPI                                                                               |             |   |   | ■  |    |    |    |    |    |    |
| Neurology          | Modified SHIRPA, grip strength                                                                                |             |   | ■ |    |    |    |    |    |    |    |
|                    | Rotarod                                                                                                       |             |   |   | ■  |    |    |    |    |    |    |
| Dysmorphology      | Anatomical observation                                                                                        |             |   | ■ |    |    |    |    |    |    |    |
| Energy Metabolism  | Indirect calorimetry                                                                                          |             |   |   |    | ■  |    |    |    |    |    |
| Cardiovascular     | Awake ECG / Echo cardiography                                                                                 |             |   |   |    |    | ■  |    |    |    |    |
| Clinical Chemistry | IpGTT                                                                                                         |             |   |   |    |    |    | ■  |    |    |    |
| Neurology          | Auditory brain stem response (ABR)                                                                            |             |   |   |    |    |    |    | ■  |    |    |
| Dysmorphology      | X-Ray, DEXA                                                                                                   |             |   |   |    |    |    |    | ■  |    |    |
| Eye                | Scheimpflug imaging, Laser-interference-biometry (LIB), Optical coherence tomography (OCT), Virtual drum test |             |   |   |    |    |    |    |    | ■  |    |
| Clinical Chemistry | Clinical Chemical analysis, hematology                                                                        |             |   |   |    |    |    |    |    |    | ■  |
| Immunology         | Flow cytometry, plasma (IgE, IL6, TNF, insulin)                                                               |             |   |   |    |    |    |    |    |    | ■  |
| Pathology          | Macro & microscopic analysis                                                                                  |             |   |   |    |    |    |    |    |    | ■  |

**Fig. S1.** Phenotyping pipeline used to analyse *Dhx9*<sup>-/-</sup> mice showing category and test performed and mouse age in weeks at testing

# Supplemental Figure 2

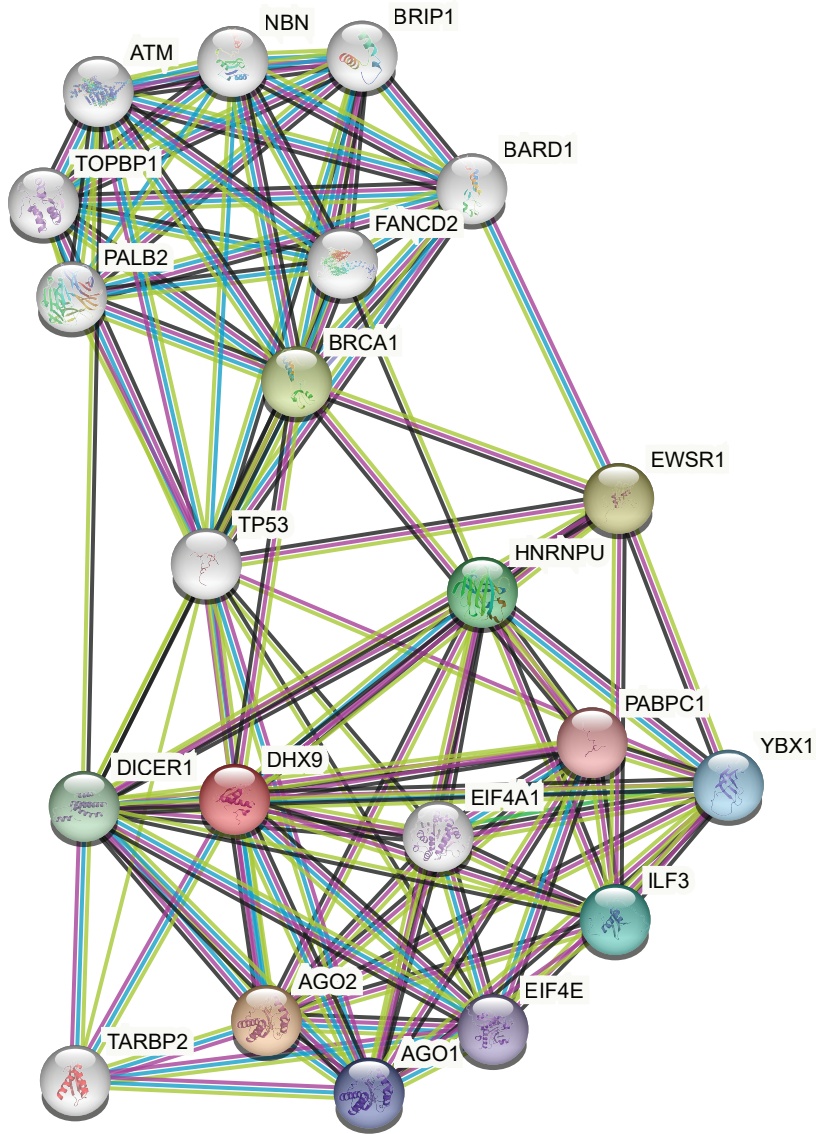

DHX9 interactome - <https://string-db.org/>

# Supplemental Figure 3

A)

## Nuclear localization signal

|                            |                 |   |   |   |   |               |
|----------------------------|-----------------|---|---|---|---|---------------|
| <i>H. sapiens</i>          | Y G D G P R P P | K | M | A | R | Y D N G S G Y |
| <i>P. troglodytes</i>      | Y G D G P R P P | K | M | A | R | Y D N G S G Y |
| <i>M. mulatta</i>          | Y G D G P R P P | K | M | A | R | Y D N G S G Y |
| <i>P. hamadryas</i>        | Y G D G P R P P | K | M | A | R | Y D N G S G Y |
| <i>B. taurus</i>           | Y G D G P R P P | K | M | A | R | Y D N G S G Y |
| <i>E. caballus</i>         | Y G D G P R P P | K | M | A | R | Y D N G S G Y |
| <i>C. lupus familiaris</i> | Y G D G P R P P | K | M | A | R | Y D N G G G Y |
| <i>M. musculus</i>         | Y G D G P R P P | K | M | A | R | Y D N G S G Y |
| <i>R. norvegicus</i>       | Y G D G P R P P | K | M | A | R | Y D N G S G Y |
| <i>L. africana</i>         | Y G D G P R P P | K | M | A | R | Y D N G S G Y |
| <i>D. novemcinctus</i>     | Y G D G P R P P | K | M | A | R | Y D N G S G Y |
| <i>A. carolinensis</i>     | Y G D G P R P P | K | M | A | R | Y D N G G G Y |
| <i>D. rerio</i>            | F G D G P R P P | K | M | A | R | T D F G G G F |

B) WT DHX9

| Predicted NLSs in query sequence                   |     |
|----------------------------------------------------|-----|
| IVLVDDWIKLQISHEAAACITGLRAAMEALVVEVTKQPAIISQLDPVNER | 50  |
| MLNMIRQISRPSAAGINLMIGSTRYGDGPRPPKMARYDNGSGYRRGGSSY | 100 |
| SGGGYGGGYSGGYGSGGYGGSANSFRAGYGAGVGGGYRGVSRGGFRGNS  | 150 |
| GGDYRGPSSGYRSGGGFQRGGGRGAYGTGYFGQGRGGGGY           | 190 |

| Predicted monopartite NLS |             |       |
|---------------------------|-------------|-------|
| Pos.                      | Sequence    | Score |
| 78                        | GPRPPKMARYD | 7.5   |

C) p.(Lys1163Arg)

| Predicted NLSs in query sequence                   |     |
|----------------------------------------------------|-----|
| IVLVDDWIKLQISHEAAACITGLRAAMEALVVEVTKQPAIISQLDPVNER | 50  |
| MLNMIRQISRPSAAGINLMIGSTRYGDGPRPPMARYDNGSGYRRGGSSY  | 100 |
| SGGGYGGGYSGGYGSGGYGGSANSFRAGYGAGVGGGYRGVSRGGFRGNS  | 150 |
| GGDYRGPSSGYRSGGGFQRGGGRGAYGTGYFGQGRGGGGY           | 190 |

| Predicted monopartite NLS |          |       |
|---------------------------|----------|-------|
| Pos.                      | Sequence | Score |
|                           |          |       |

D) p.(Arg1166Pro)

| Predicted NLSs in query sequence                   |     |
|----------------------------------------------------|-----|
| IVLVDDWIKLQISHEAAACITGLRAAMEALVVEVTKQPAIISQLDPVNER | 50  |
| MLNMIRQISRPSAAGINLMIGSTRYGDGPRPPKMAPYDNGSGYRRGGSSY | 100 |
| SGGGYGGGYSGGYGSGGYGGSANSFRAGYGAGVGGGYRGVSRGGFRGNS  | 150 |
| GGDYRGPSSGYRSGGGFQRGGGRGAYGTGYFGQGRGGGGY           | 189 |

| Predicted monopartite NLS |          |       |
|---------------------------|----------|-------|
| Pos.                      | Sequence | Score |
|                           |          |       |

# Supplemental Figure 4

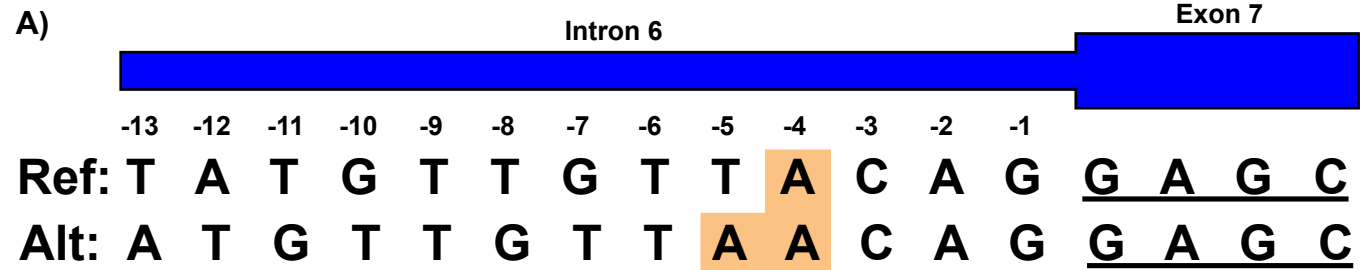

B)

GENOMNIS | HOME | HSF | SETTINGS | ABOUT | CONTACTS

**Mutation Selection**

Format: jsor | Download | Copy

Search:

| Mutations        | HGVS Nomenclature            |
|------------------|------------------------------|
| 1 182856528 A/AA | ENST00000367549.4:c.627-4dup |

Showing 1 to 1 of 1 entries | 1 row selected

Selection: 1 182856528 A/AA

**Impact Prediction**

Format: text | Download | Copy

| Type                     | Interpretation                                                          |
|--------------------------|-------------------------------------------------------------------------|
| New Acceptor splice site | Activation of a cryptic Acceptor site. Potential alteration of splicing |

| Algorithm/Matix              | position       | sequences                                        | variation                   |
|------------------------------|----------------|--------------------------------------------------|-----------------------------|
| HSF Acceptor site (matix AG) | chr1:182856524 | - REF : TGTTACAGGAGCTT<br>- ALT : TGTTAACAGGAGCT | 16.08 > 72.22<br>=> 349.13% |

Showing 1 to 1 of 1 entries

C)

| $\Delta$ type | $\Delta$ score <sup>?</sup> | pre-mRNA position <sup>?</sup> |
|---------------|-----------------------------|--------------------------------|
| Acceptor Loss | 0.02                        | 4 bp                           |
| Donor Loss    | 0.01                        | 50 bp                          |
| Acceptor Gain | 0.14                        | 18 bp                          |
| Donor Gain    | 0.00                        |                                |



# Supplemental Figure 5

Nucleolus

DSB

R-loop

EGFP  
(backbone)

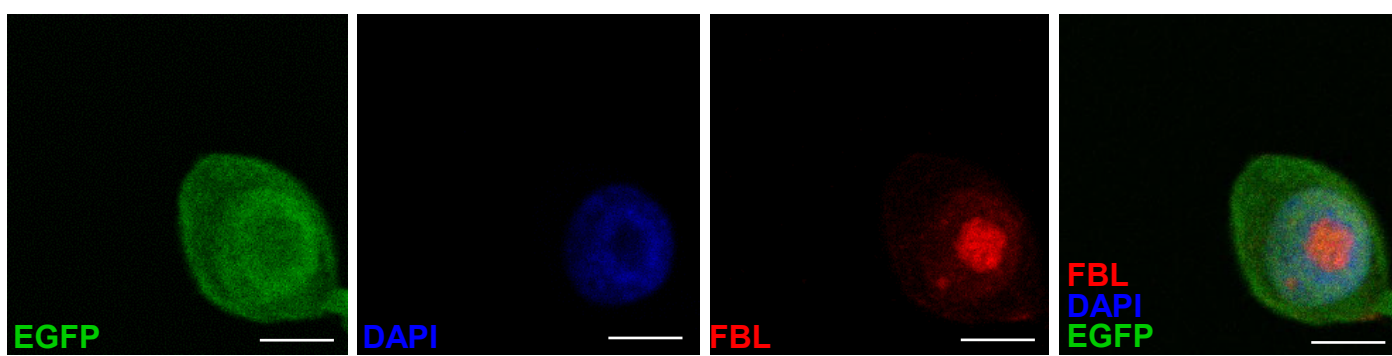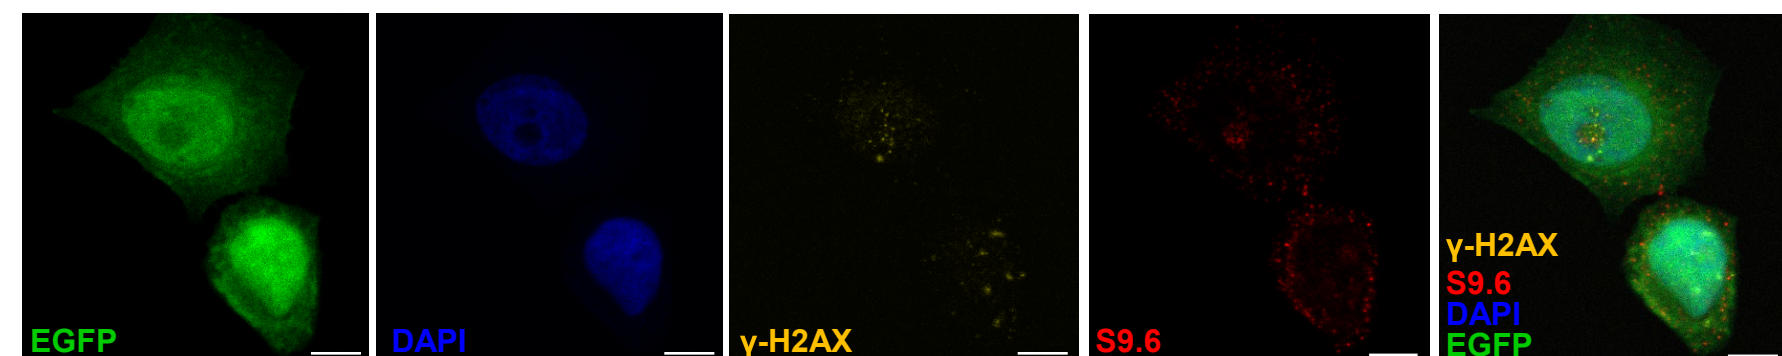

p.(Lys1163Arg)  
(severe NDD)

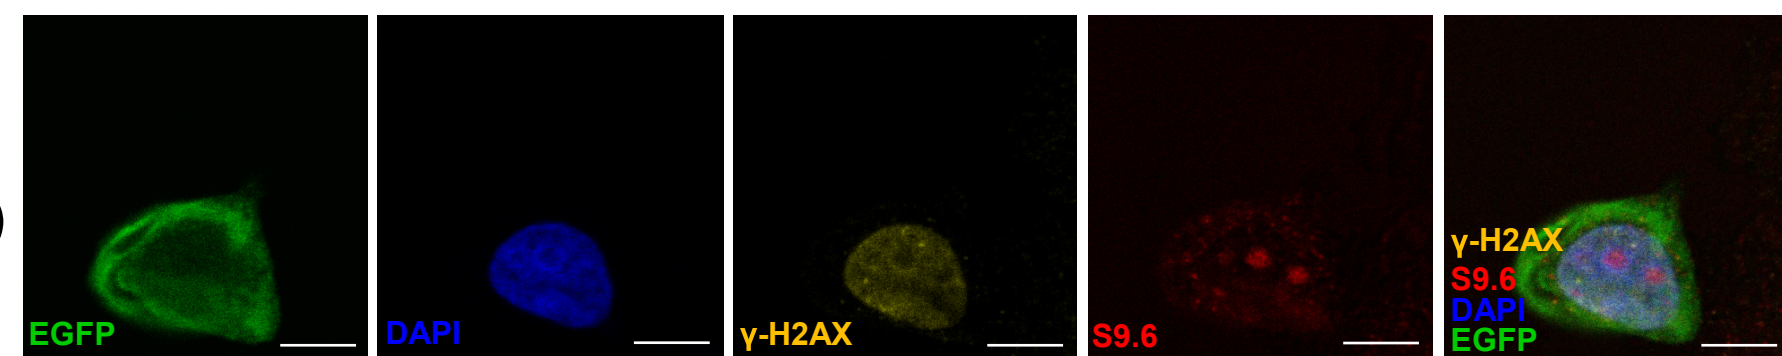

p.(Arg1166Pro)  
(severe NDD)

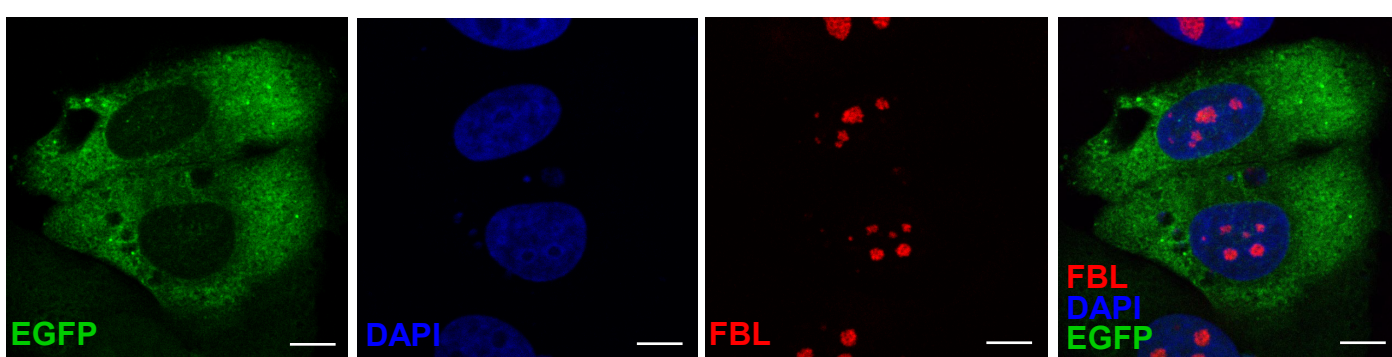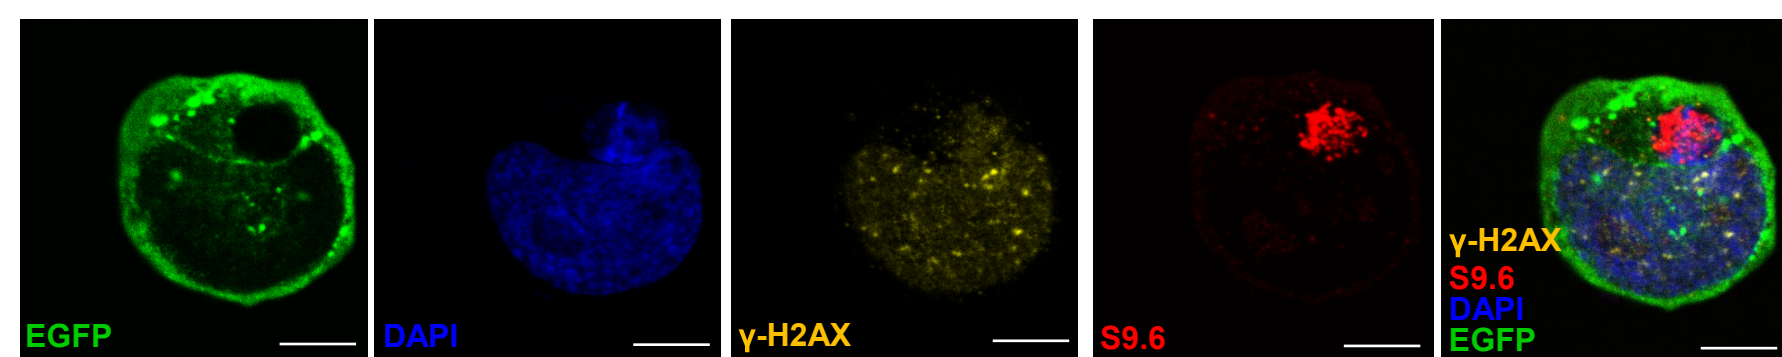

p.(Arg229Ter)  
(mild NDD)

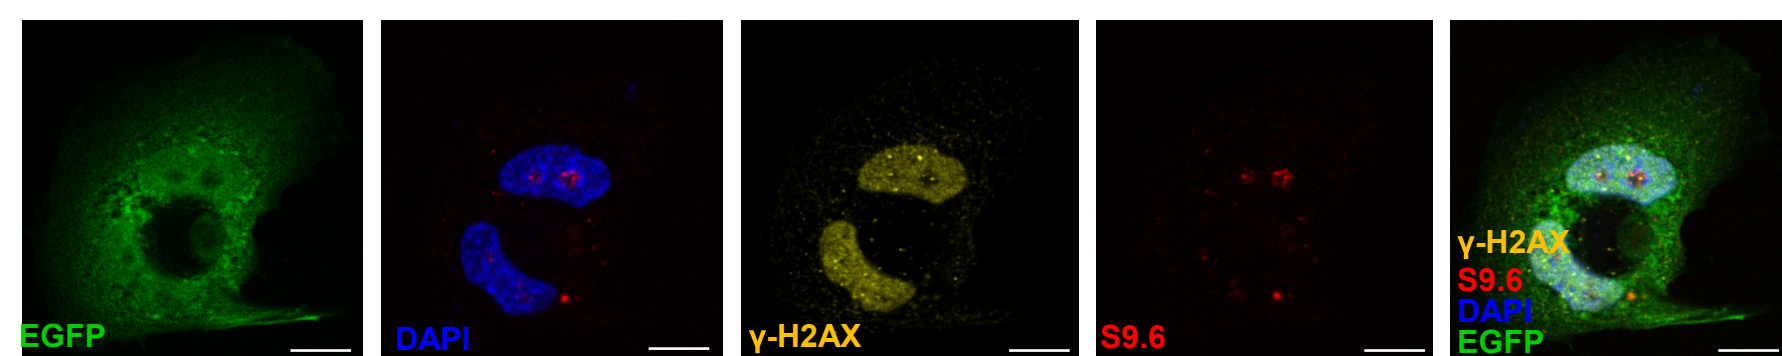

p.(Glu693GlyfsTer7)  
(mild NDD)

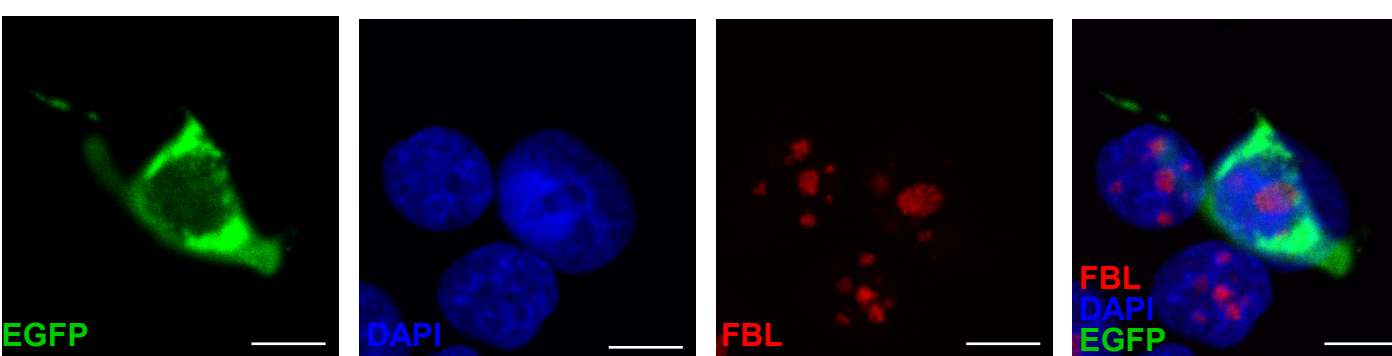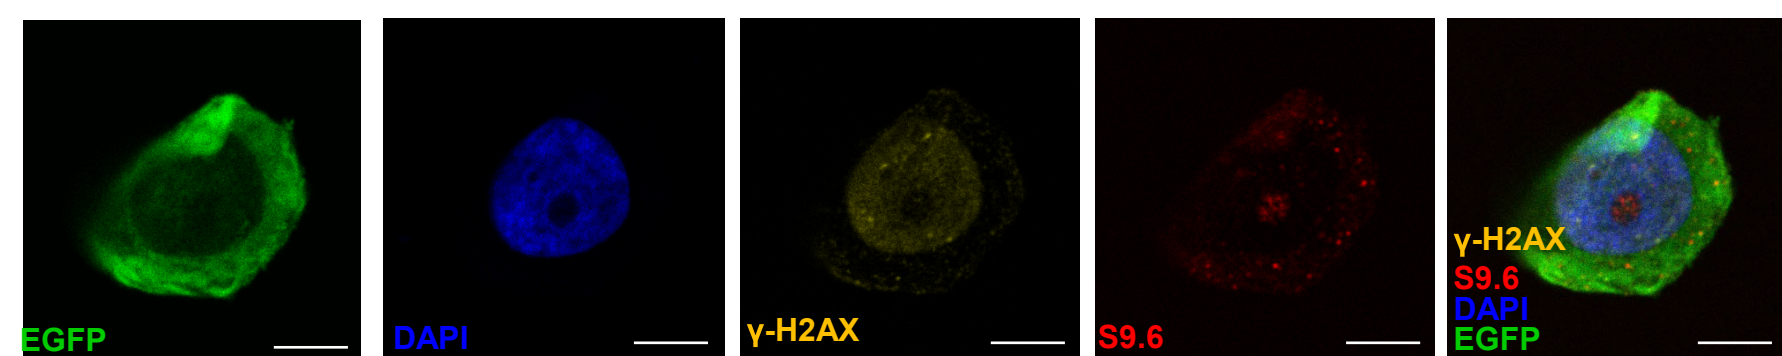

p.(Arg764Ter)  
(NDD)

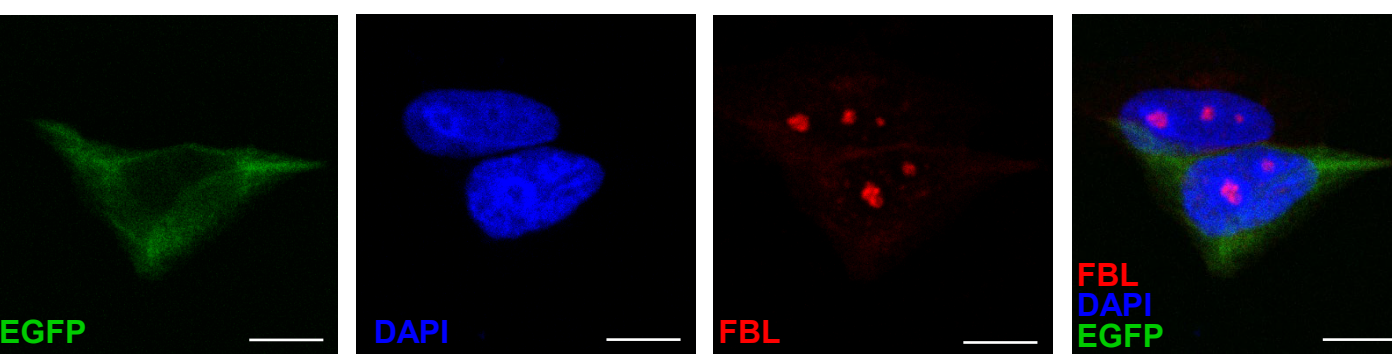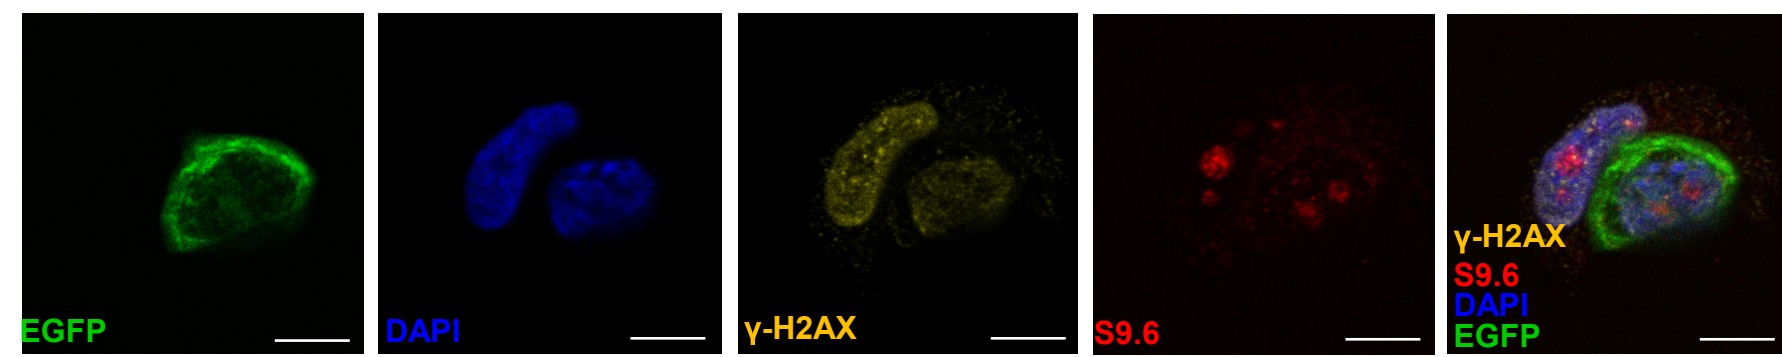

p.(Arg837Thr)  
(CMT)

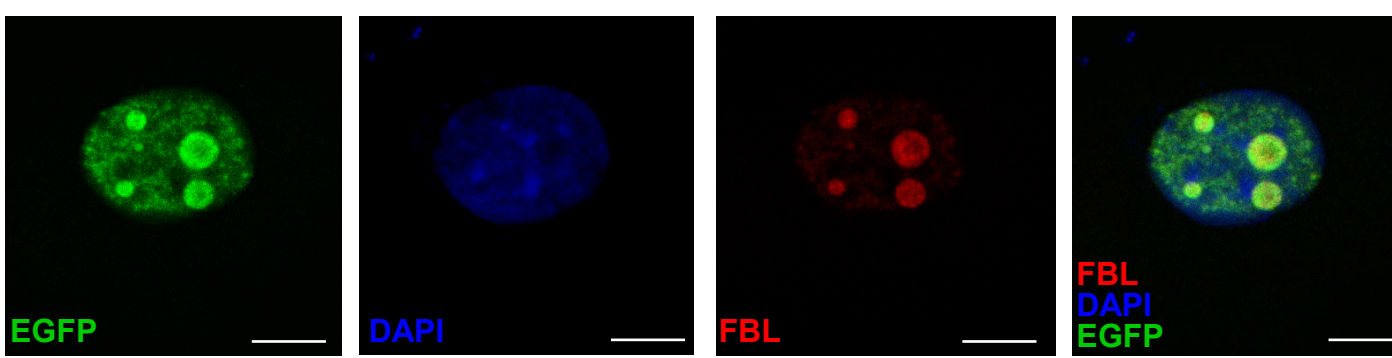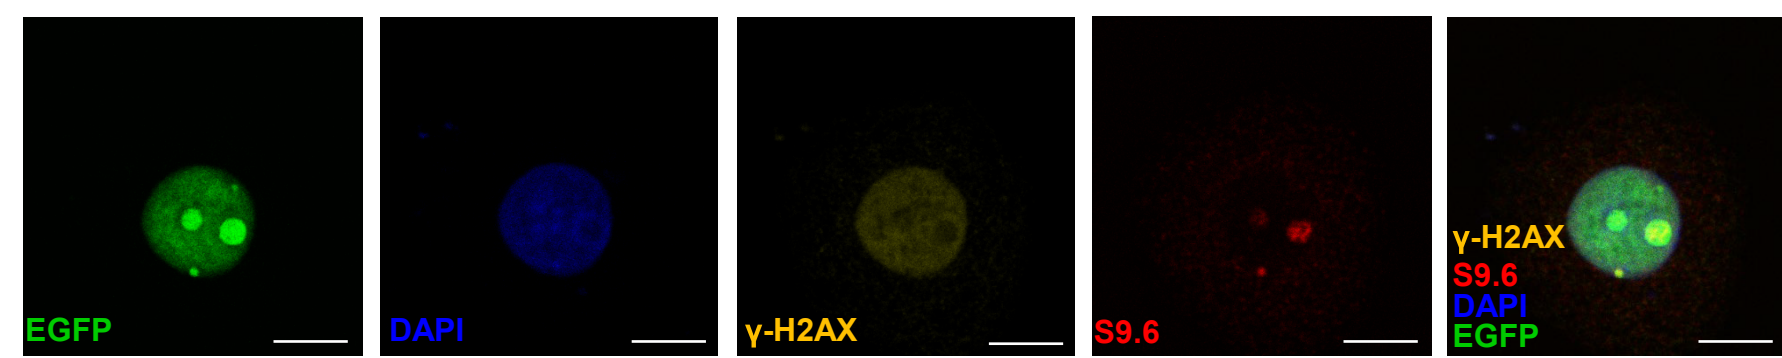

p.(Asp846Gly)  
(CMT)

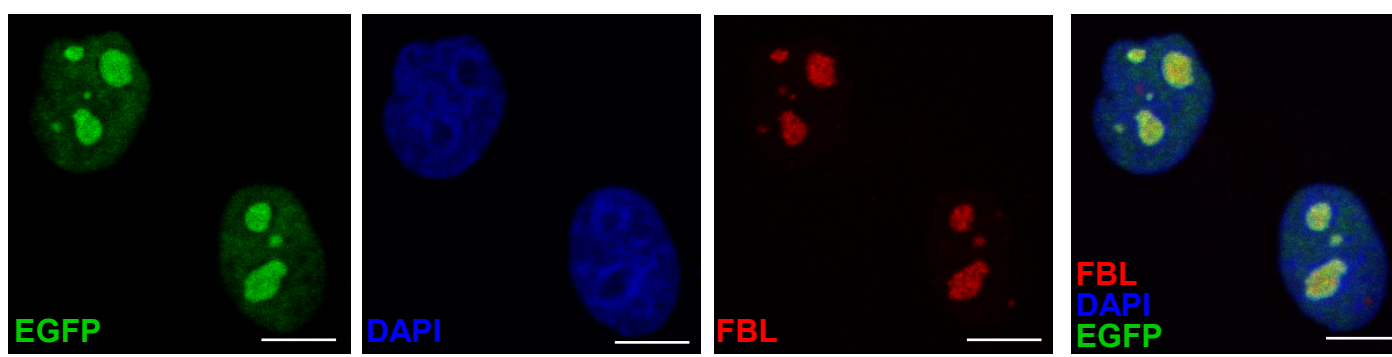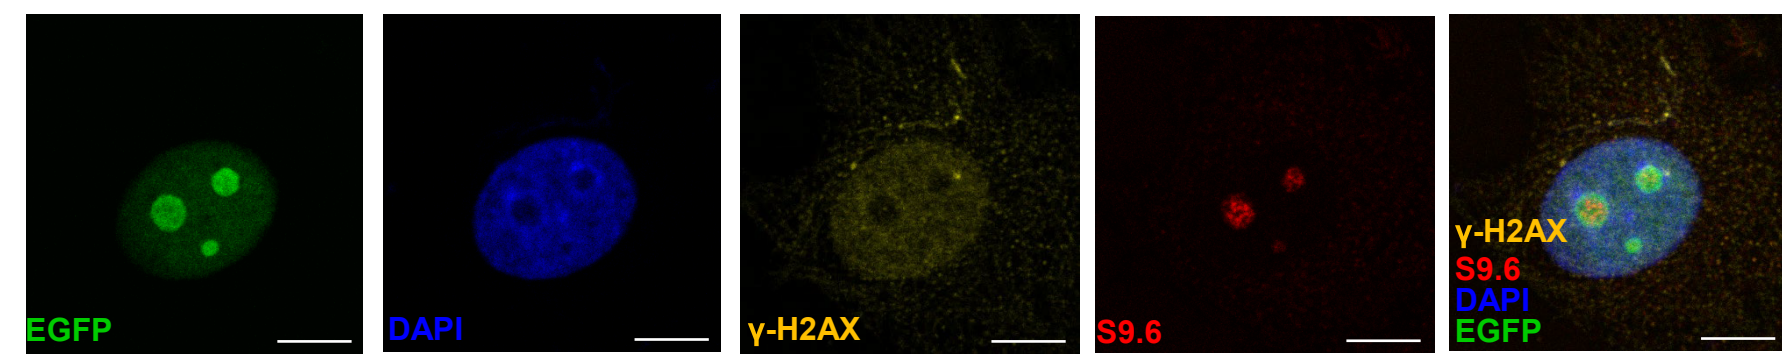

p.(Ala1255Thr)  
(CMT)

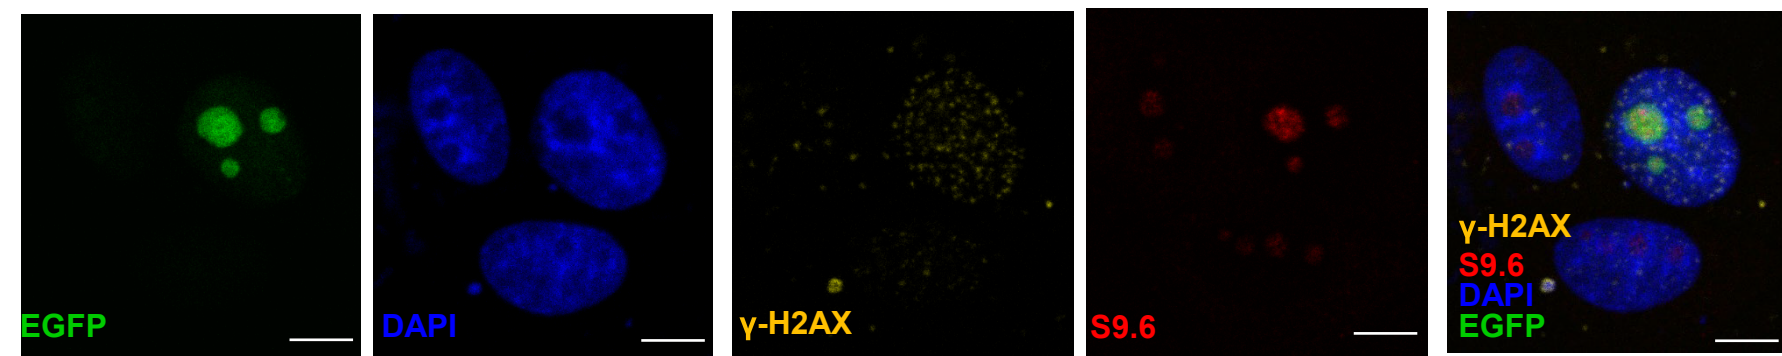



# Supplemental Figure 6

## p.(Gly411Glu) (mild NDD)

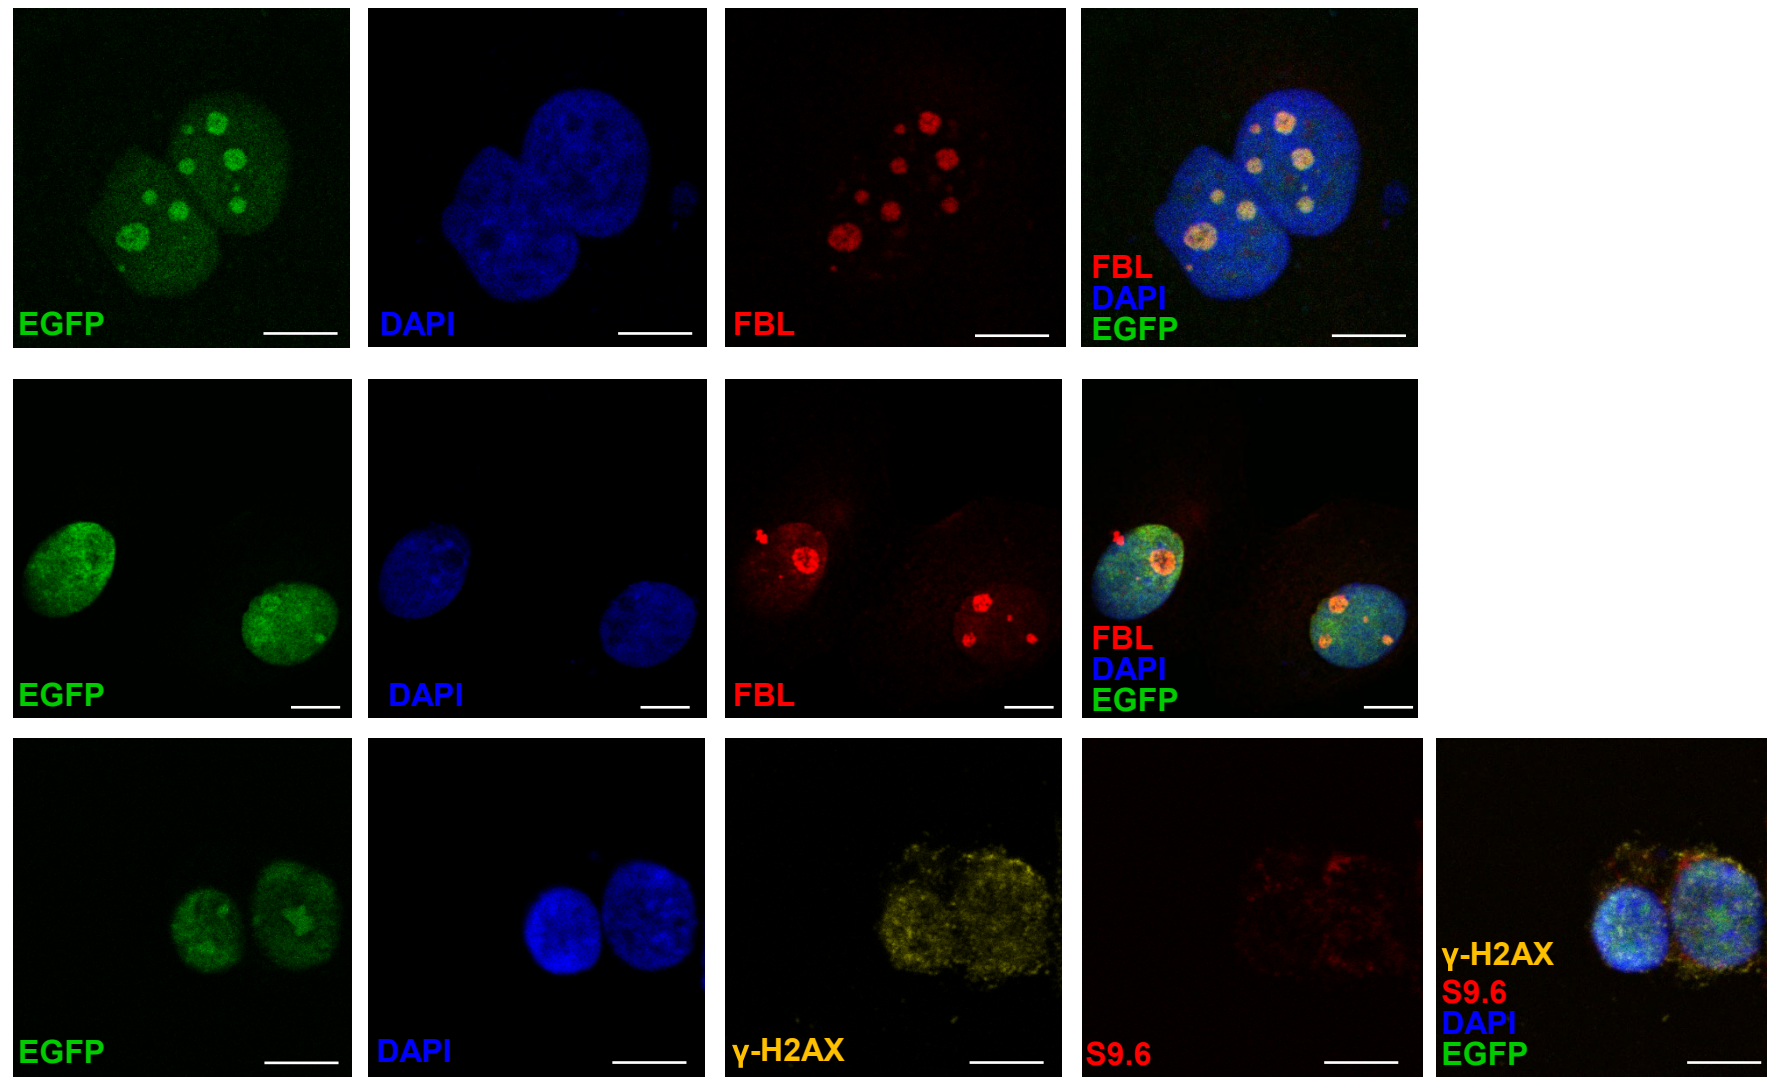

## p.(Val473Ile) (mild NDD)

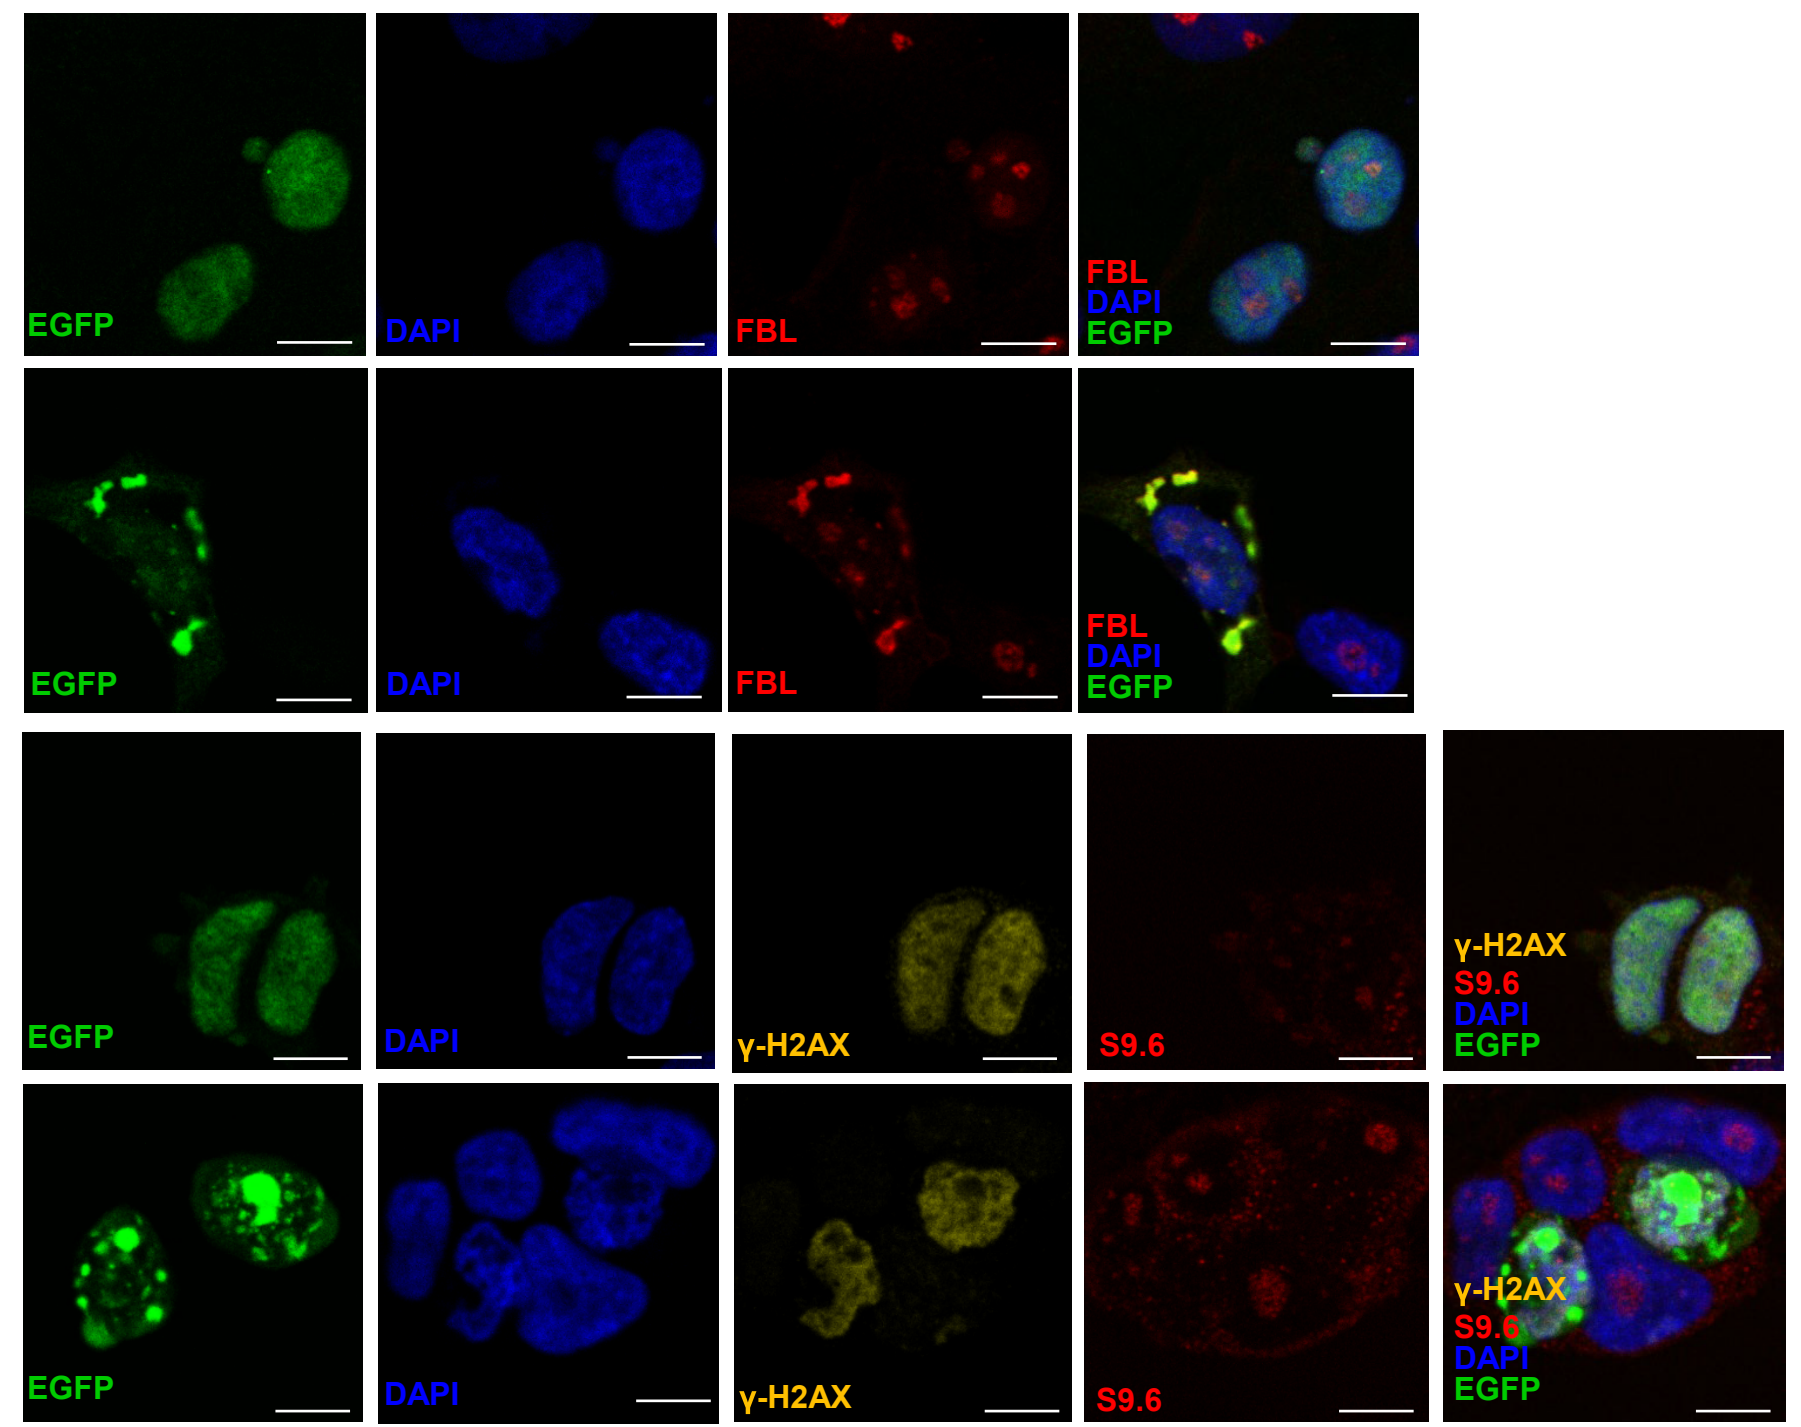

## p.(Cys608Gly) (mild NDD)

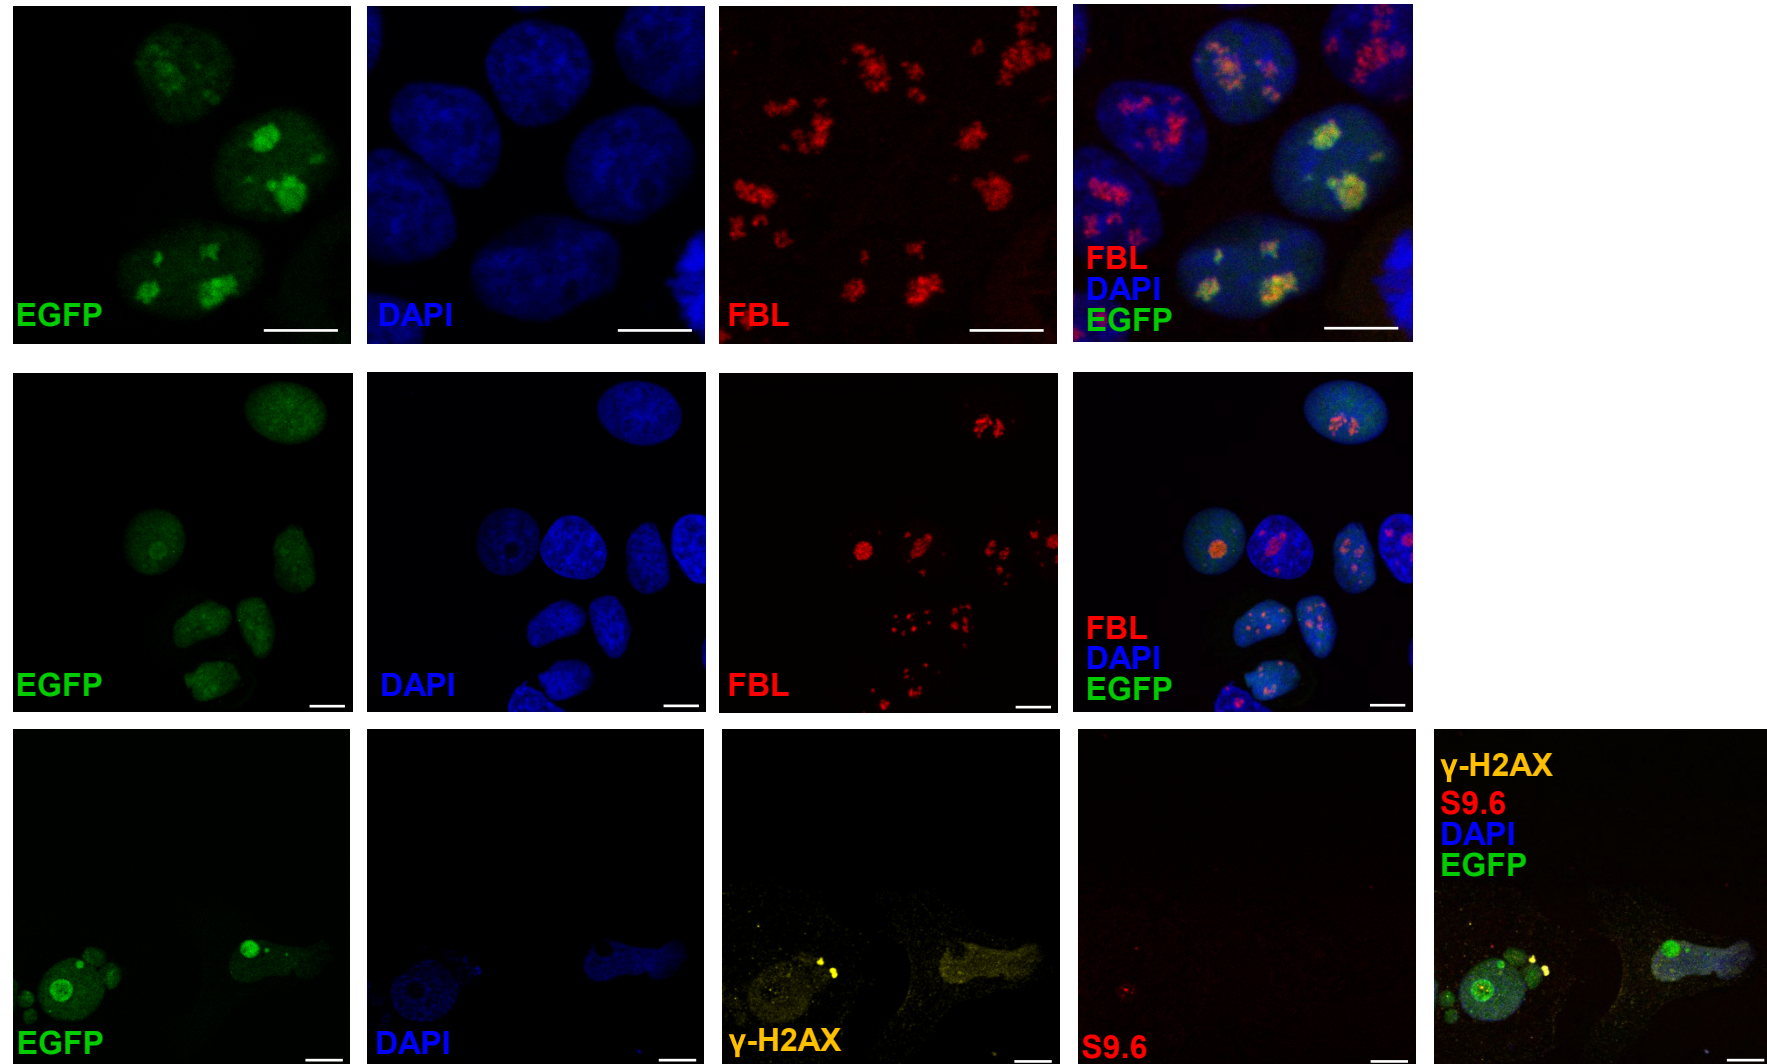

## p.(Arg761Gln) (mild NDD)

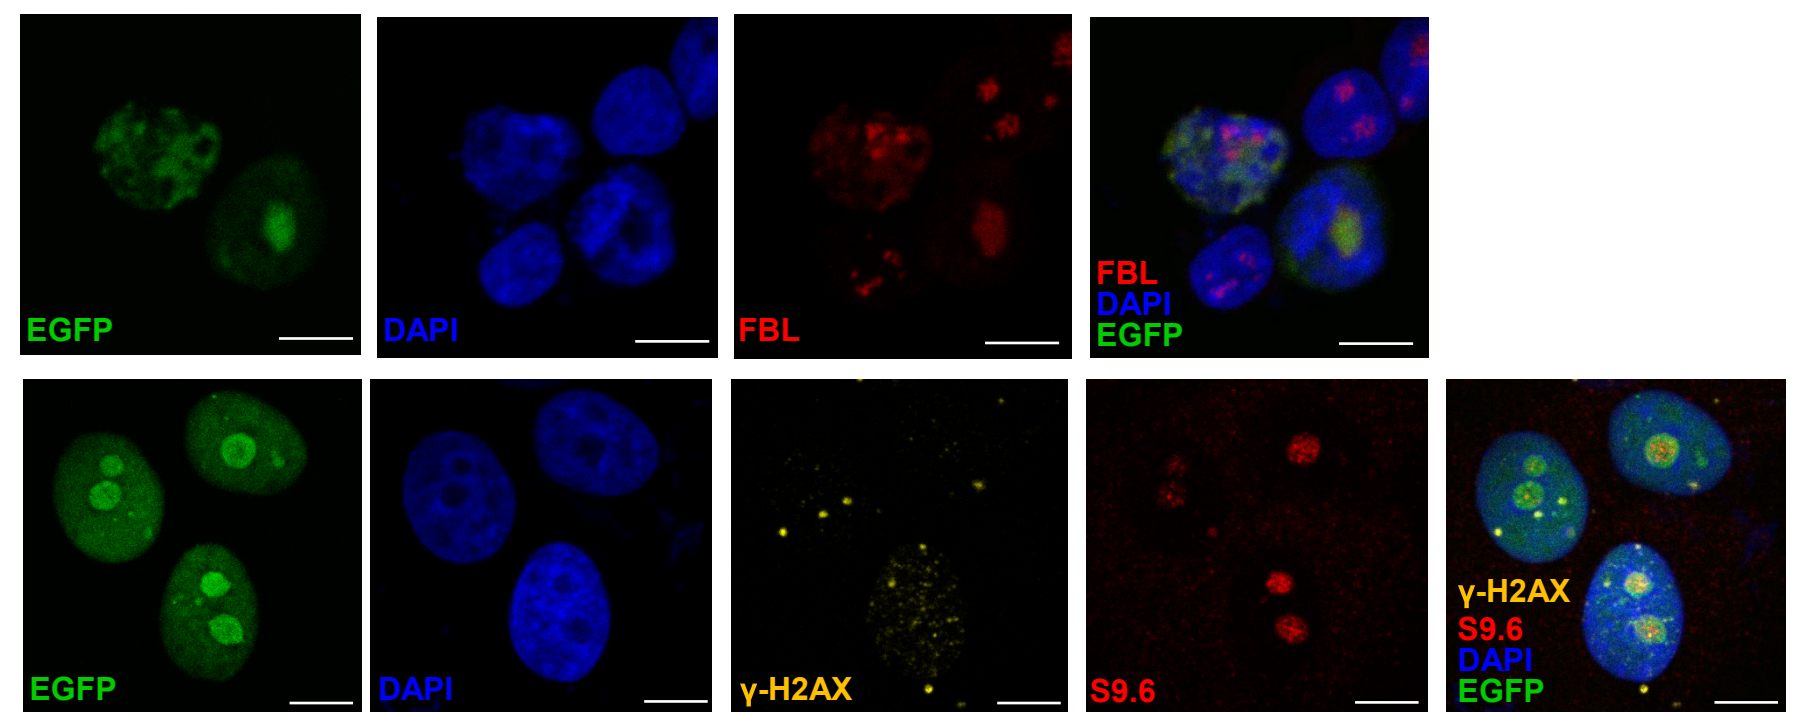



# Supplemental Figure 7

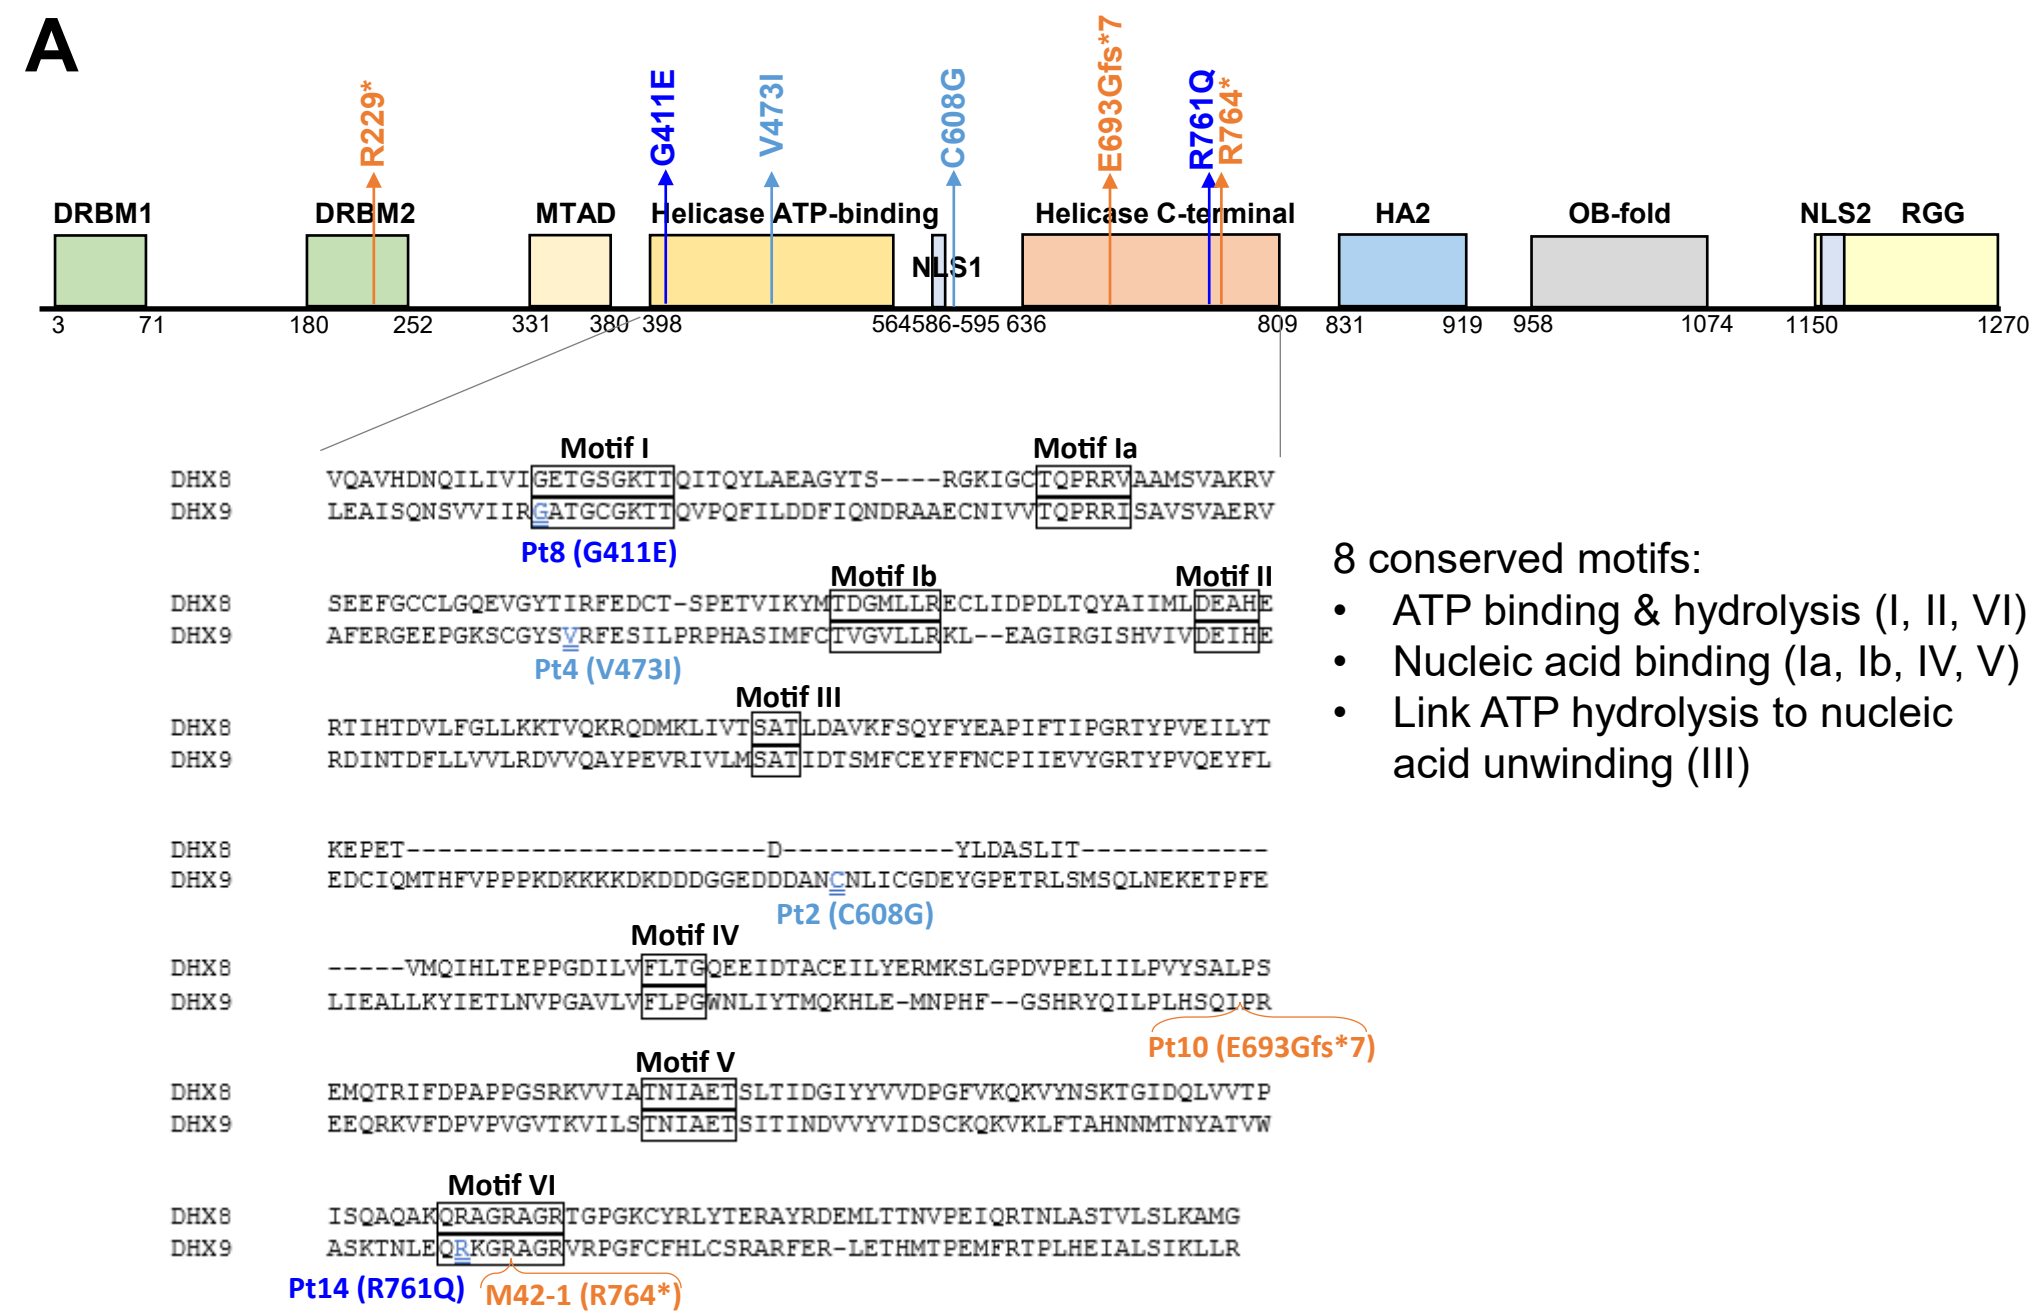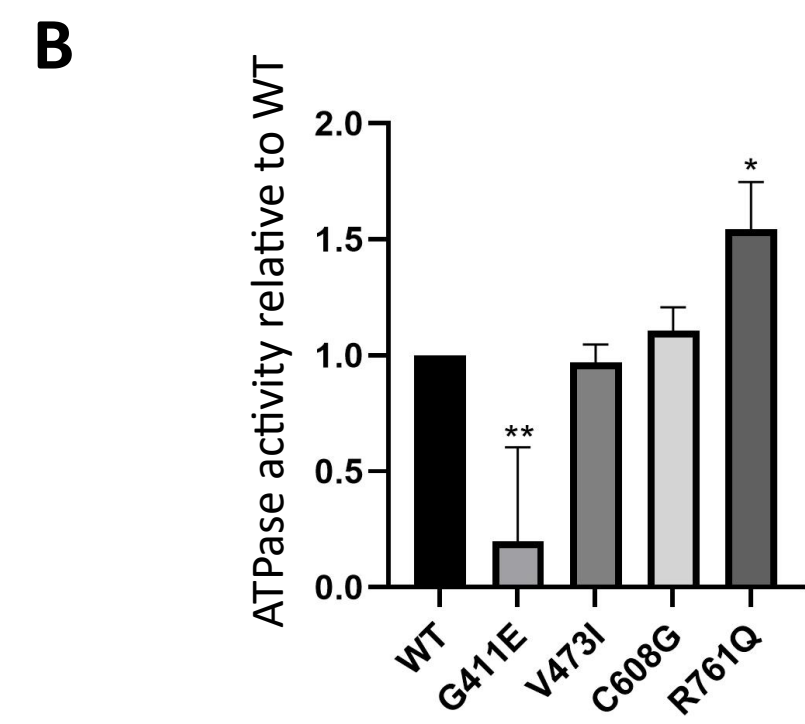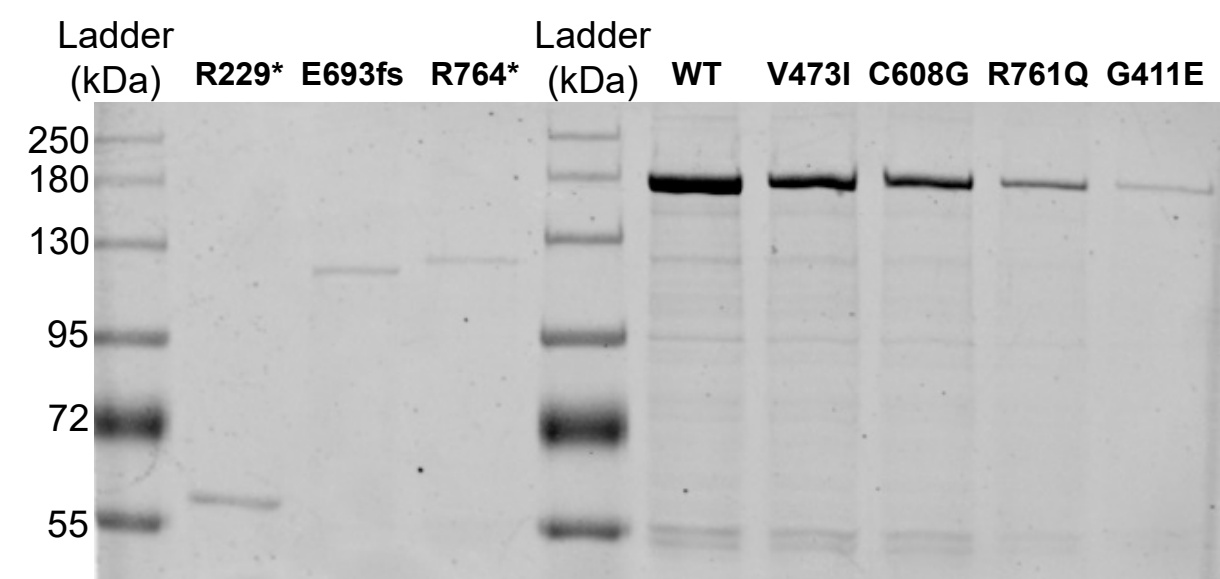

# Supplemental Figure 8

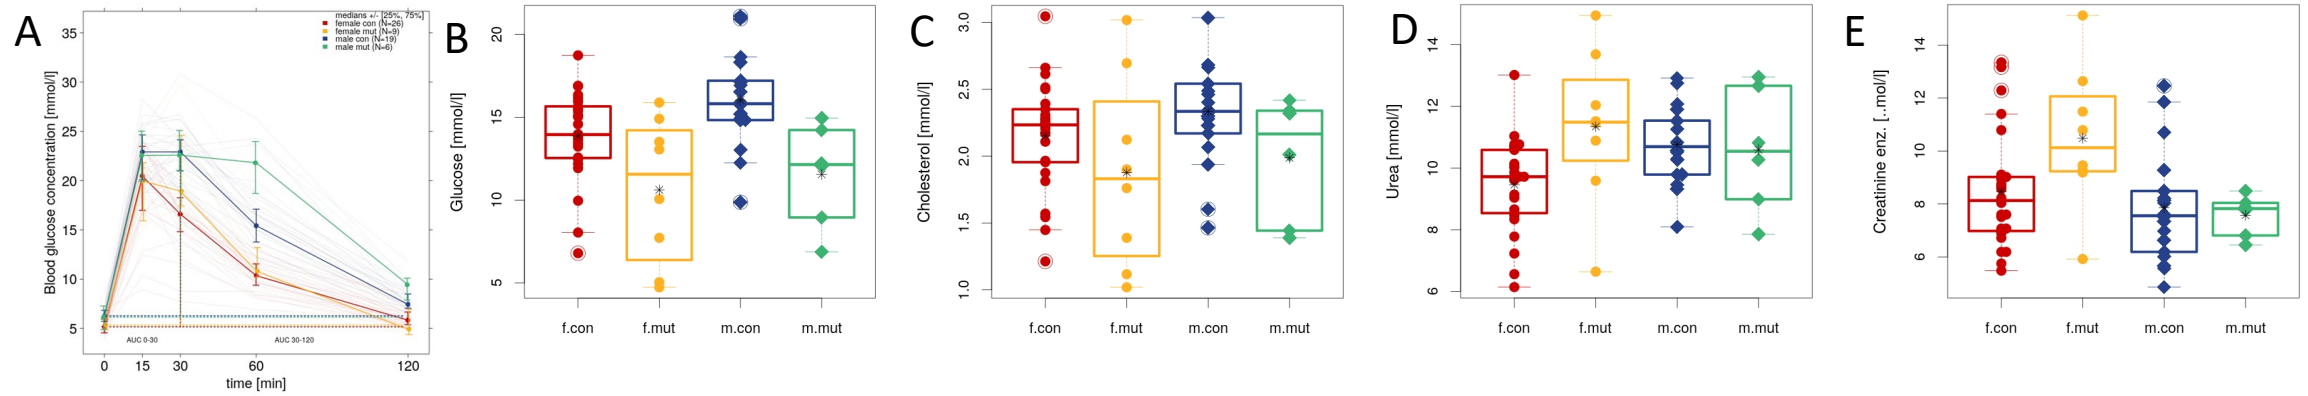

| IpGTT results        | female          |                             | male            |                               | linear model      | linear model      | linear model |
|----------------------|-----------------|-----------------------------|-----------------|-------------------------------|-------------------|-------------------|--------------|
|                      | con             | mut                         | con             | mut                           | genotype          | sex               | genotype:sex |
|                      | n=26            | n=9                         | n=19            | n=6                           |                   |                   |              |
|                      | mean ± sd       | mean ± sd                   | mean ± sd       | mean ± sd                     | p-value           | p-value           | p-value      |
| <b>Glucose (T=0)</b> | 5.35 ± 0.81     | 5.42 ± 0.56 <sup>a</sup>    | 6.23 ± 1.04     | 6.03 ± 1.27                   | 0.822             | 0.014             | 0.664        |
| <b>AUC 0-30</b>      | 295.39 ± 94.35  | 330.05 ± 74.5 <sup>a</sup>  | 366.05 ± 51.65  | 384.82 ± 65.12 <sup>a</sup>   | 0.302             | 0.018             | 0.758        |
| <b>AUC 30-120</b>    | 417.75 ± 176.08 | 551.57 ± 208.3 <sup>a</sup> | 724.27 ± 183.29 | 1050.96 ± 226.25 <sup>a</sup> | <b>&lt; 0.001</b> | <b>&lt; 0.001</b> | 0.123        |

**Fig. S8.** Loss of *Dhx9* in mice causes differences in clinical chemistry indices indicative of altered metabolism and renal function

# Supplemental Figure 9

A

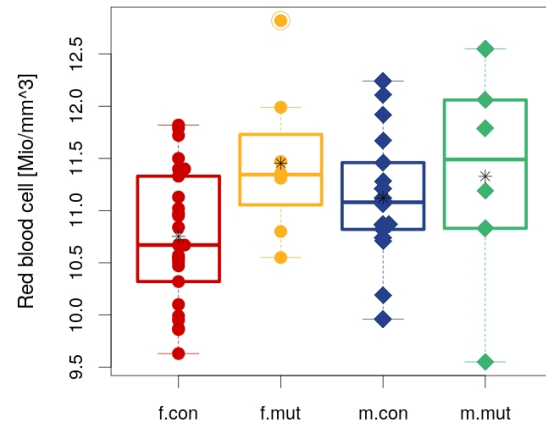

B

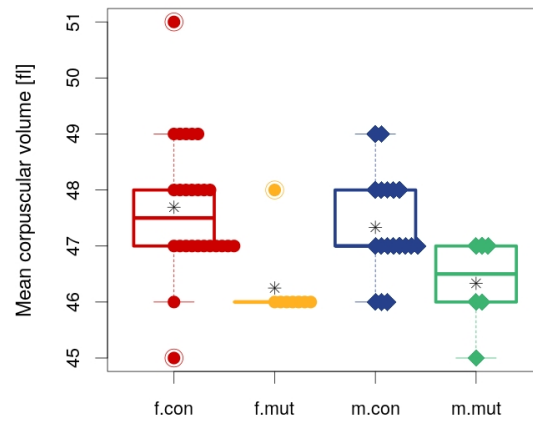

C

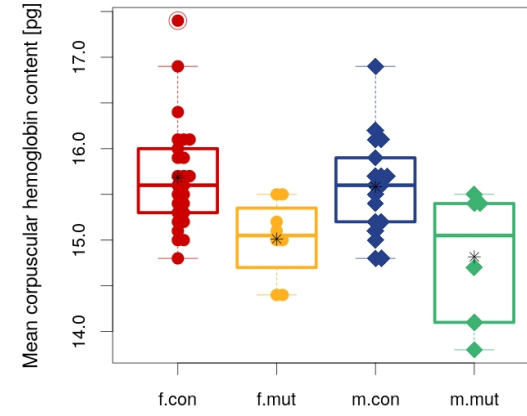

D

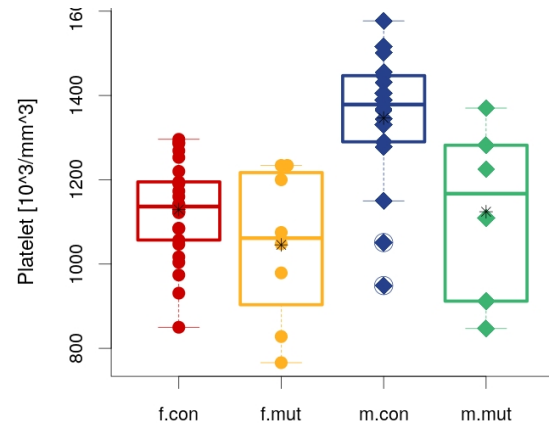

E

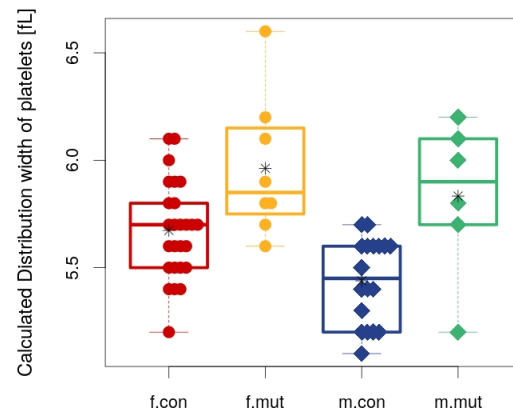

F

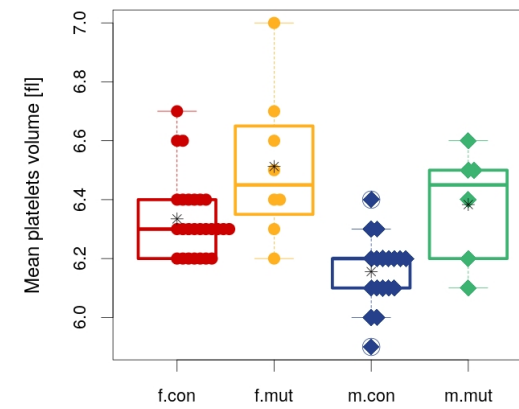

**Fig. S9.** Loss of *Dhx9* in mice causes haematological alterations indicative of effects on erythropoiesis and thrombopoiesis

# Supplemental Table 1

| Assay                         | Age (weeks) | Number (n) |         |       |         |
|-------------------------------|-------------|------------|---------|-------|---------|
|                               |             | +/+        |         | -/-   |         |
|                               |             | Males      | Females | Males | Females |
| Open field                    | 8           | 19         | 26      | 6     | 9       |
| SHIRPA                        | 9           | 19         | 26      | 6     | 9       |
| Grip strength                 | 9           | 19         | 26      | 6     | 9       |
| Acoustic startle              | 10          | 19         | 26      | 6     | 9       |
| Indirect calorimetry          | 11          | 18         | 26      | 6     | 9       |
| Glucose tolerance test        | 13          | 19         | 26      | 6     | 9       |
| Auditory brainstem response   | 14          | 14         | 16      | 4     | 4       |
| Clinical chemistry/hematology | 16          | 19         | 26      | 6     | 9       |

**Table S1.** Number of *Dhx9* -/- tested in the assays where relevant differences were detected.

**Supplemental Table 2**

| <b>Variant Type<br/>(Patient ID)</b> | <b>Disease Type</b> | <b>Severity</b> | <b>DHX9 location</b>            | <b>DSB pattern<br/>and level</b> | <b>R-loop pattern<br/>and level</b> |
|--------------------------------------|---------------------|-----------------|---------------------------------|----------------------------------|-------------------------------------|
| WT                                   | -                   | -               | Diffuse nuclear                 | Scattered, low                   | Gathered, +                         |
| Truncating<br>(9,10,M42-1)           | NDD                 | Mild            | Whole cell                      | Ubiquitous, +                    | Gathered, +                         |
| NLS missense<br>(3,5)                | NDD                 | Severe          | Cytoplasm only                  | Ubiquitous, +                    | Gathered, +                         |
| Missense (1)                         | NDD                 | Severe          | Diffuse nuclear                 | Ubiquitous, ++                   | Ubiquitous, ++                      |
| Missense<br>(2,4,8,11)               | NDD                 | Mild            | Diffuse nuclear<br>or nucleolar | Ubiquitous, low                  | Gathered, low                       |
| Missense<br>(15,16,17)               | CMT                 | -               | Nucleolar                       | Ubiquitous, low                  | Gathered, low                       |

## Supplemental Table 3

| Transfected expression plasmid | Absorbance at 620nm |         |         | Average |
|--------------------------------|---------------------|---------|---------|---------|
|                                | Trial 1             | Trial 2 | Trail 3 |         |
| No transfection blank          | 0.442               | 0.441   | 0.441   | 0.441   |
| EGFP-backbone                  | 0.435               | 0.342   | 0.343   | 0.373   |
| EGFP-DHX9 WT                   | 0.646               | 0.647   | 0.66    | 0.651   |
| DHX9 p.R229*                   | 0.377               | 0.433   | 0.417   | 0.409   |
| DHX9 p.G411E                   | 0.457               | 0.419   | 0.466   | 0.447   |
| DHX9 p.V473I                   | 0.628               | 0.653   | 0.634   | 0.638   |
| DHX9 p.C608G                   | 0.648               | 0.688   | 0.656   | 0.664   |
| DHX9 p.E693Gfs*7               | 0.438               | 0.358   | 0.421   | 0.406   |
| DHX9 p.R764*                   | 0.41                | 0.447   | 0.428   | 0.428   |
| DHX9 p.R761Q                   | 0.6                 | 0.614   | 0.593   | 0.602   |



### **Supplemental Text**

Limited clinical details were available for three individuals: two within the BHCMG/GREGoR, BAB4646 and M42-1, and a patient from a simplex autism spectrum disorder (ASD) cohort<sup>19</sup>. BAB4646 and M42-1 have the only two *DHX9* pLoF variants within the BHCMG database of 12,266 exomes and genomes. BAB4646's phenotype is severe DD/ID and primary immunodeficiency. Proband ES identified two heterozygous pathogenic variants in *TRNT1*(NM\_182916.2): c.1246A>G, p.(Lys416Glu) and c.608+1G>T. As *TRNT1* causes autosomal recessive syndrome sideroblastic anemia with B-cell immunodeficiency, periodic fevers, and developmental delay [MIM: 616084], these variants likely contribute to the individual's DD/ID and immunodeficiency. Further confirmation of this contention was obfuscated by the lack of additional DNA samples from the proband or his parents precluding variant phasing and determination of *de novo* status.

Subject M42-1 was enrolled in a mitochondrial disease cohort and is one of two affected siblings with encephalopathy, stroke-like episodes, and drug-resistant epilepsy. Proband ES failed to identify a candidate variant to explain the patient's mitochondrial disease, and sibling DNA is not available for testing. While *DHX9* pLoF variants are unlikely to completely explain the phenotypes of BAB4646 and M42-1, they may contribute to their neurologic dysfunction via multi-locus pathogenic variation to a blended traits phenotype<sup>53</sup>.
